# Supplementary material for: The critical role that STAT3 plays in glioma-initiating cells: STAT3 addiction in glioma
Source: PubMed Central journal article supplement (PMC5955139; doi:10.18632/oncotarget.25188), 2018-04-24
Supplement: oncotarget-09-22095-s001.pdf [file oncotarget-09-22095-s001.pdf]

## The critical role that STAT3 plays in glioma-initiating cells: STAT3 addiction in glioma

### SUPPLEMENTARY MATERIALS

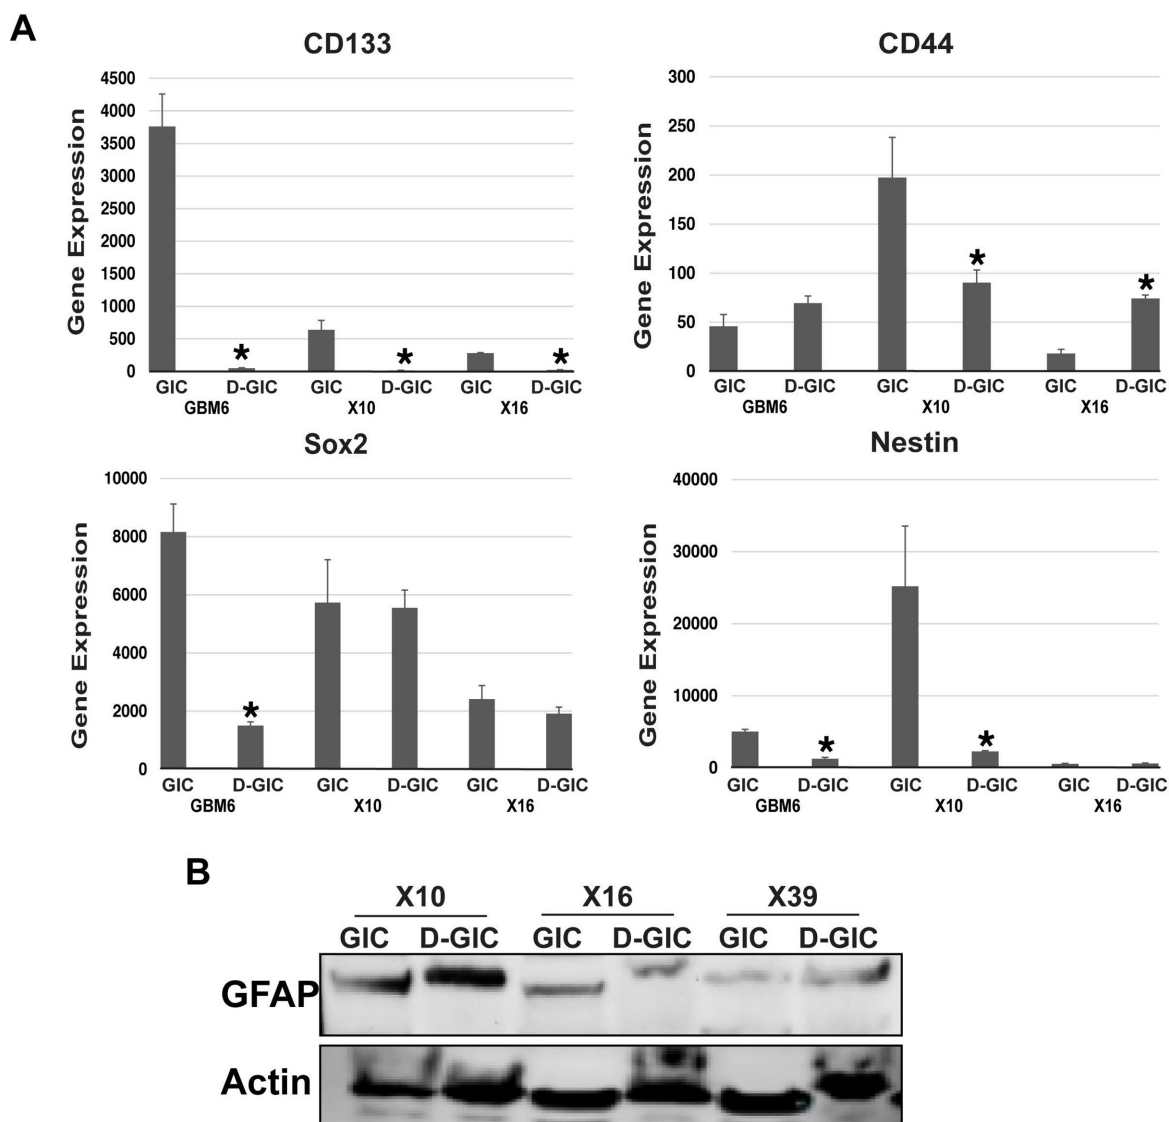

**Supplementary Figure 1: Stem cell marker expression in the GICs and GICs induced to differentiate.** GICs were grown under stem cell conditions or induced to differentiate for several passages in serum-containing medium (D-GICs). **(A)** qPCR was performed on RNA for *CD133*, *CD44*, *SOX2*, *NESTIN* and *Polr2A*, and gene expression normalized to *Polr2A* expression. **(B)** Protein lysates were immunoblotted for the astrocyte differentiation marker, GFAP, in the GBMX10, GBMX16 and GBX39 GICs and corresponding D-GICs.

**X16**

**Control STAT3-KD**

**tSTAT1**

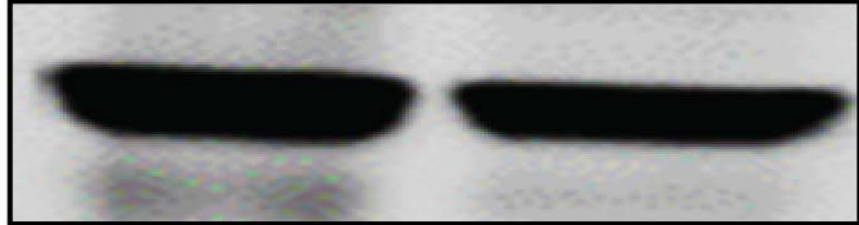

**tSTAT5**

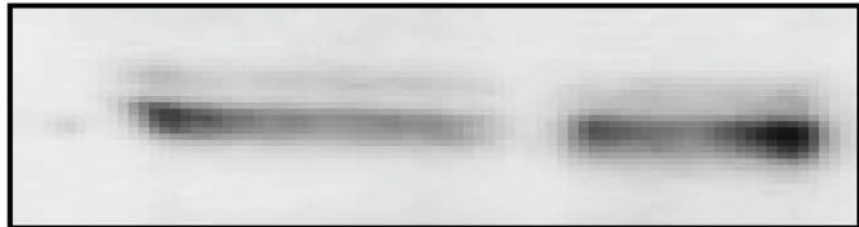

**Actin**

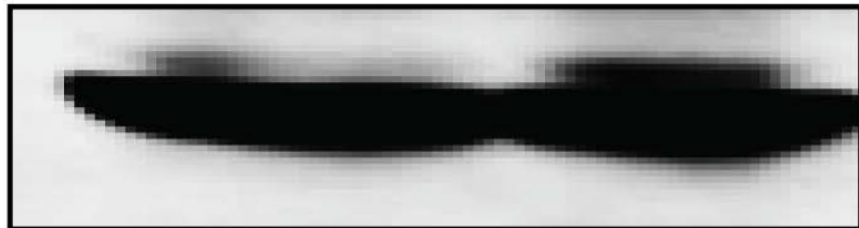

**Supplementary Figure 2: STAT3-KD has no effect on STAT1 and STAT5 protein expression in the X16 GICs.**  
Immunoblots of protein lysates from iSTAT3-KD GBMX16 GICs treated with Dox using antibodies against STAT1 and STAT5.

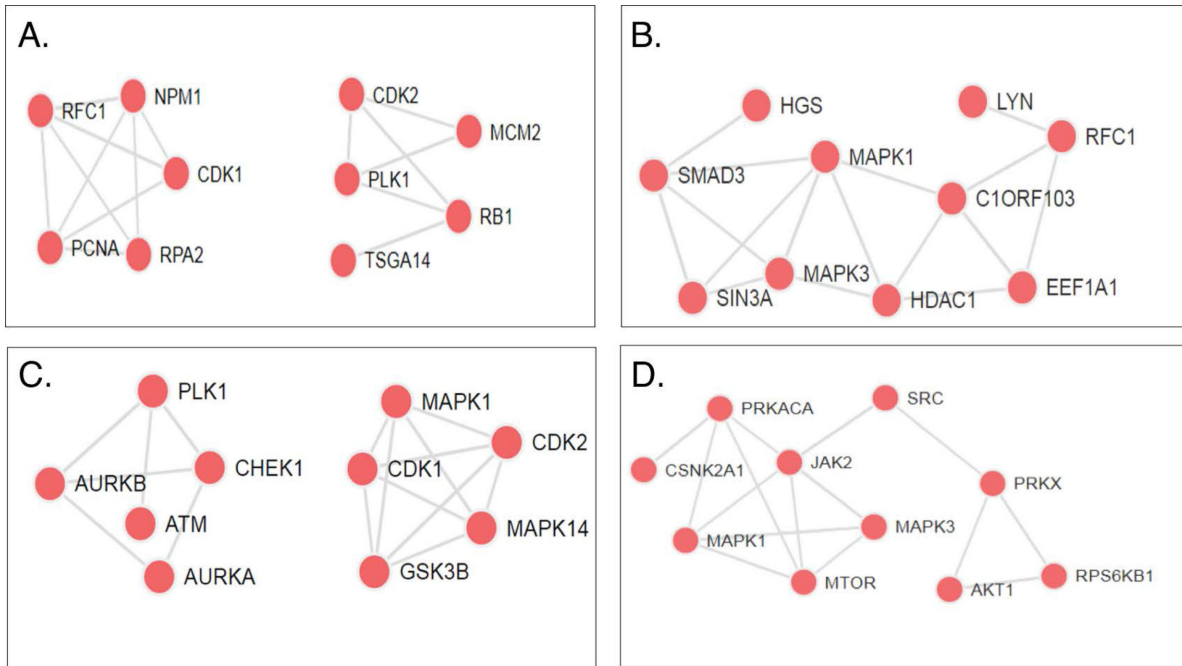

**Supplementary Figure 3: Protein-protein interaction and kinase substrate networks analysis of STAT3-regulated genes identified by RNA-seq.** RNA-Seq analysis was performed on RNA prepared from GBMX16 GICs not treated with Dox, GBMX16 GICs treated with Dox (STAT3-KD GICs), and WT-STAT3 rescued STAT3-KD GICs. **(A)** Protein-protein interaction (PPI)-Hub proteins associated with STAT3 activated genes. **(B)** Kinase substrate networks associated with STAT3 activated genes. **(C)** PPI-Hub proteins associated with STAT3 suppressed genes. **(D)** Kinase substrate networks associated with STAT3 suppressed genes.

**Supplementary Table 1: Sequences of primers used for qPCR**

| <b>Target</b> | <b>Sequence (5'-3')</b>                                |
|---------------|--------------------------------------------------------|
| POLR2A        | 5'ATGTCTGTGACGGAGGGTGGCA<br>3'GGCCAGGACACTCTGTCTATGTTT |
| STAT3         | 5'CAGCAGCTTGACACACGGTA<br>3'GCCCAATCTTGACTCTCAATCC     |
| CD133         | 5'AGTCGGAAACTGGCAGATAGC<br>3'GGTAGTGTTGTACTGGGCCAAT    |
| CD44          | 5'TTACAGCCTCAGCAGAGCAC<br>3'TGACCTAAGACGGAGGGAGG       |
| SOX2          | 5'GCCGAGTGGAAACTTTTGTCG<br>3'GGCAGCGTGTACTTATCCTTCT    |
| NESTIN        | 5'CTGCTACCCTTGAGACACCTG<br>3'GGGCTCTGATCTCTGCATCTAC    |
| AMIGO         | 5'TTCCGTACCCACCAGAACA<br>3'AGCTCTGGCCACCTCAAAAA        |
| ARRB2         | 5'CCATGGGGGAGAAACCCG<br>3'GGTAGTCAGGGTCCACAAGC         |
| ANG           | 5'TTCCATTGTCCTGCCCGTT<br>3'TGGCATCATAGTGCTGGGT         |
| DRD2          | 5'GCTGCTGAAAACCATCTGGC<br>3'GGTCCTGGAAGGTGACTCGT       |
| GATA2         | 5'ACTCATCAAGCCCAAGCGAA<br>3'CTTCATGGTCAGTGGCCTGT       |
| CDS1          | 5'TGTTTGGATTTCATTGCTGCCTAT<br>3'TGGATCTGGAAAGGGTACAAGC |
| CHD4          | 5'CCAATGCAGTCCTGCACAAA<br>3'CTCACAGCAACTGGGGGAAT       |
| PBK           | 5'GCGGTGAGACTCTGGACTGA<br>3'CTGCATAAACGGAGAGGCCG       |
| S100B         | 5'TGTAGACCCTAACCCGGAGG<br>3'TGCATGGATGAGGAACGCAT       |
| THY1          | 5'GAAGACCCAGTCCAGATCCA<br>3'TATTCTCATGGCGGCAGTCC       |
| HMGB1         | 5'CAGAGCGGAGAGAGTGAGGA<br>3'TTGCCTCTCGGCTTCTTAGG       |
| CDK1          | 5'CTTGGCTTCAAAGCTGGCTC<br>3'GGGTATGGTAGATCCCGGCT       |
| HLA-DPB1      | 5'GTCGTGTCCACCAACCTGAT<br>3'ACTCCACGGTGACAGGACTA       |
| CD200         | 5'CACCGTCTATGTACAGCCCA<br>3'CTGGTAACAGACGTGGTCCC       |
| CCL2          | 5'ACCTGGACAAGCAAACCCAA<br>3'AGGGTGTCTGGGGAAAGCTA       |
| BTG1          | 5'CGCAACACATGGACTACCCT<br>3'CAGTAGTCAGCACTGGGGTG       |
| COL6A1        | 5'ATTGCCAAGGACTTCGTCGT<br>3'TCCACTGCAGGCTCTTGATG       |
| PMP22         | 5'TGGAAGAAGGGTTACGCTG<br>3'TCTGCCAGAGATCAGTTGCG        |
| HIF1A F1      | 5'GAAAGCGCAAGTCTTCAAAG<br>3'TGGGTAGGAGATGGAGATGC       |
